# Supplementary material for: Multilocus sequence analyses reveal extensive diversity and multiple origins of fluconazole resistance in Candida tropicalis from tropical China
Source: PubMed Central journal article supplement (PMC5301247; doi:10.1038/srep42537), 2017-02-10
Supplement: srep42537-s1.pdf [file srep42537-s1.pdf]

# Supplementary Information File

**Title of Manuscript: Multilocus sequence analyses reveal extensive diversity and multiple origins of fluconazole resistance in *Candida tropicalis* from tropical China**

Jin-Yan Wu<sup>1,2</sup>, Hong Guo<sup>2</sup>, Hua-Min Wang<sup>2</sup>, Guo-Hui Yi<sup>2</sup>, Li-Min Zhou<sup>2</sup>, Xiao-Wen He<sup>2</sup>,  
Ying Zhang<sup>1</sup> and Jianping Xu<sup>1,2,3\*</sup>

<sup>1</sup> Laboratory for Conservation and Utilization of Bio-Resources, and Key Laboratory for Microbial Resources of the Ministry of Education, Yunnan University, Kunming, Yunnan, China.

<sup>2</sup> Public Research Laboratory, Hainan Medical University, Haikou, Hainan, China.

<sup>3</sup> Department of Biology, McMaster University, Hamilton, Ontario, L8S 4K1, Canada.

**\*Corresponding author:** [jpxu@mcmaster.ca](mailto:jpxu@mcmaster.ca)

**Short title:** *Candida tropicalis* in Hainan, China

**Key words:** Multilocus sequence typing, novel genotypes, fluconazole resistance, geographic pattern

Supplementary Table S1. Locations of the six analyzed DNA fragments within the assembled genome sequence of *C. tropicalis* strain MYA-3404.

| Gene name    | Chromosomal scaffold ID | Scaffold length (bp) | Gene location within scaffold (bp) |
|--------------|-------------------------|----------------------|------------------------------------|
| <i>ICL1</i>  | NW_003020058.1          | 1,255,791            | 959,343-959789                     |
| <i>MDR1</i>  | NW_003020055.1          | 2,216,334            | 754,510-754086                     |
| <i>SAPT2</i> | NW_003020038.1          | 2,474,448            | 1,573,960-1,574,484                |
| <i>SAPT4</i> | NW_003020049.1          | 2,308,670            | 2,274,975-2,274,586                |
| <i>XYR</i>   | NW_003020040.1          | 419,327              | 35,519-35,150                      |
| <i>ZWF</i>   | NW_003020056.1          | 1,654,078            | 515,841-516,360                    |

The GenBank accession number for this genome sequence is AAFN01000000. The relevant information about this genome can be accessed at:

[www.ncbi.nlm.nih.gov/bioproject/13675](http://www.ncbi.nlm.nih.gov/bioproject/13675). The above six scaffolds are among 23 chromosomal scaffolds assembled for this *C. tropicalis* genome.



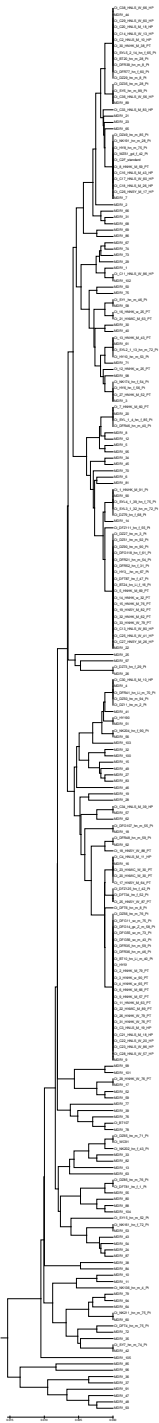

Supplementary Figure S2. Relationships among the unique genotypes at the *MDR1* locus in the *Candida tropicalis* MLST database and those of our 116 strains from Hainan Island.

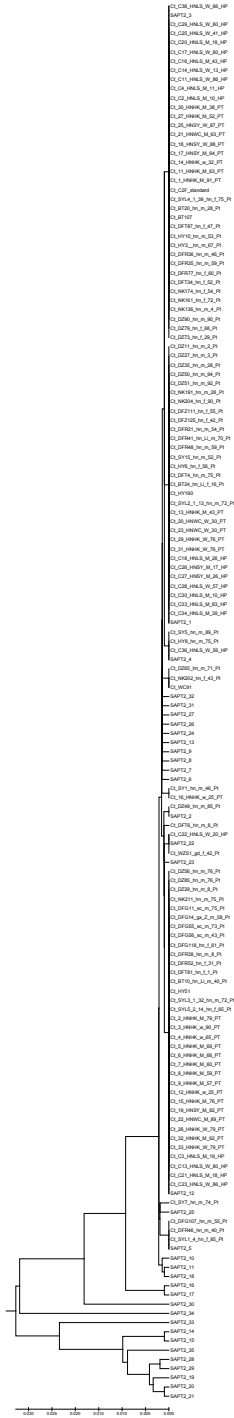

Supplementary Figure S3. Relationships among the unique genotypes at the *SAPT2* locus in the *Candida tropicalis* MLST database and those of our 116 strains from Hainan Island.

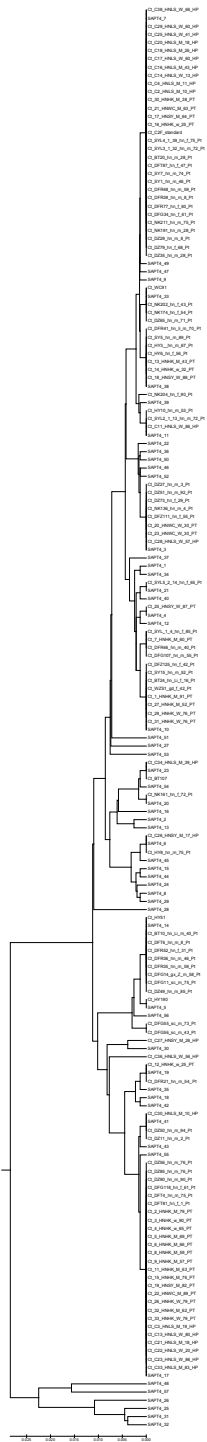

Supplementary Figure S4. Relationships among the unique genotypes at the *SATP4* locus in the *Candida tropicalis* MLST database and those of our 116 strains from Hainan Island.

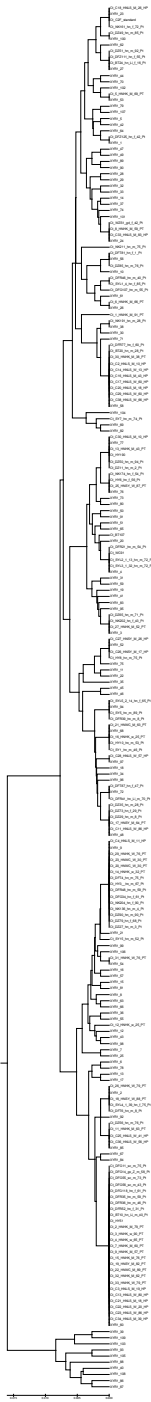

Supplementary Figure S5. Relationships among the unique genotypes at the *XYRI* locus in the *Candida tropicalis* MLST database and those of our 116 strains from Hainan Island.

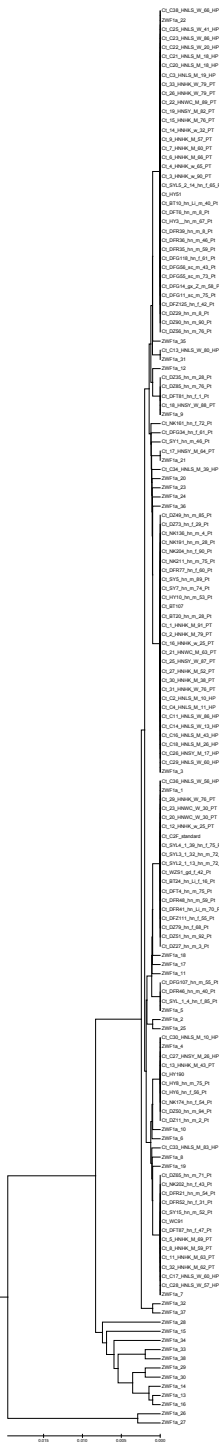

Supplementary Figure S6. Relationships among the unique genotypes at the *ZWF1a* locus in the *Candida tropicalis* MLST database and those of our 116 strains from Hainan Island.
